# Supplementary material for: CompressGraph: Efficient Parallel Graph Analytics with Rule-Based Compression
Source: Atypon-hosted journal article supplement (doi:10.1145/3588684), 2023-05-26
Supplement: 3588684_readme.pdf [file 3588684_readme.pdf]

# CompressGraph

---

## 1. Description

---

This is the open-source implementation for CompressGraph:

CompressGraph: Efficient Parallel Graph Analytics with Rule-Based Compression”, Zheng Chen, Feng Zhang, Jiawei Guan, Jidong Zhai, Xipeng Shen, Huanchen Zhang, Wentong Shu, Xiaoyong Du. SIGMOD/PODS '23: Proceedings of the 2023 International Conference on Management of Data. <https://dl.acm.org/doi/10.1145/3588684>

## 2. Getting Started

---

### 2.1 System Dependency

- [CMake](#)
- OpenMP and C++17
- CUDA
- Optional(CPU): [Ligra](#)
- Optional(GPU): [Gunrock](#)

### 2.2 Compilation

```
git clone https://github.com/ZhengChenCS/CompressGraph.git --recursive
cd CompressGraph
mkdir -p build
cd build
cmake .. -DLIGRA=ON -DGUNROCK=ON
make -j
```

If you just want to run application on CPU, you can set `-DGUNROCK=OFF` .

### 2.3 Graph Input Format

The initial input graph format should be in the [adjacency graph format](#). For example, the SNAP format(edgelist) and the adjacency graph format for a sample graph are shown below.

SNAP format:

```
src dst
0 1
0 2
2 0
2 1
```

Adjacency Graph format:

```
AdjacencyGraph
3 <The number of vertices>
4 <The number of edges>
0 <o0>
2 <o1>
2 <o2>
1 <e0>
2 <e1>
0 <e2>
1 <e3>
```

## 3. CompressGraph Compression

---

### 3.1 Data Preparation

The Compression Module accepts binary CSR(Compressed Sparse Row) graph data as input, which contains a `vlist` and a `elist` array. We provide two programs for converting graph files from edgelist and adjacency graph format to CSR format. User can invoke them as follows:

- Edgelist to CSR

```
edgelist2csr < <edgelist.txt>
```

- Adjacency graph to CSR

```
adj2csr < <adjgraph.txt>
```

The two programs will generate two output files in CSR format: `csr_vlist.bin` and `csr_elist.bin` in the current directory.

## 3.2 Graph Compression

The `dataset` folder provides an example.

To compress a input graph, run:

```
compress <csr_vlist.bin> <csr_elist.bin>
```

To filter the rule by the threshold(16 by default), run:

```
filter <csr_vlist.bin> <csr_elist.bin> <info.bin> 16
```

The `filter` program will filter out rules that meet  $(freq - 1) * (len - 1) - 1 \leq threshold$ ; , where `freq` is the frequency of rules, `len` is the length of rules.

We also provide a filtering program `filter_decomp` that can filter out rules that do not meet the frequency and length requirements separately.

```
filter_decomp <csr_vlist.bin> <csr_elist.bin> <info.bin> <freq_threshold> <len_threshold>
```

The `filter_decomp` will filter out rules that meet `freq < freq_threshold || len < len_threshold` .

## 4. CompressGraph Analytics

We have implemented the CompressGraph analytic engine based on [Ligra](#) on CPU and [Gunrock](#) on GPU.

### 4.1 Data Preparation

Before running the graph analytic program, we need to convert the CSR format to the format required by Ligra. Additionally, we generate some auxiliary structures, including `order.bin` and `degree.bin` (used in `pagerank` and `hits`).

```
$convert2ligra $csr_vlist $csr_elist > $output
$save_degree $csr_vlist
$gene_rule_order $csr_vlist $csr_elist $info
```

We provide a script `data_prepare.sh` and `data_prepare_gpu.sh` to execute the data preparation process in `script` directory.

### 4.2 Run Applications

Users can execute graph applications using the following approach:

```
./bfs_cpu -r 1 $file
./cc_cpu $file
./sssp_cpu -r 1 $file
./pagerank_cpu -maxiters 10 -i $info -d $degree -o $order $file
./topo_cpu -i $info $file
./hits_cpu -maxiters 10 -i $info -o $order $file
```

```
./bfs_gpu $file 0
./cc_gpu $file
./sssp_gpu $file $info 0
./pagerank_gpu $file
./hits_gpu $file
./topo_gpu $file $info
```

We provide scripts in `script/cpu` and `script/gpu` directory to execute these programs.

## 4.3 Run applications with script

```
cd script
bash data_prepare.sh
cd cpu
bash bfs.sh
bash sssp.sh
bash cc.sh
bash pagerank.sh
bash topo.sh
bash hits.sh
cd gpu
bash bfs.sh
bash sssp.sh
bash cc.sh
bash pagerank.sh
bash topo.sh
bash hits.sh
```

## 5. Citation

---

If you use our code, please cite our paper:

```
@article{chen2023compressgraph,
  title={CompressGraph: Efficient Parallel Graph Analytics with Rule-Based Compression},
  author={Chen, Zheng and Zhang, Feng and Guan, JiaWei and Zhai, Jidong and Shen, Xipeng and Zhang, Huanchen and Shu, Wentong and Du},
  journal={Proceedings of the ACM on Management of Data},
  volume={1},
  number={1},
  pages={1--31},
  year={2023},
  publisher={ACM New York, NY, USA}
}
```
